# Supplementary material for: Two-dimensional transition metal carbide (Ti3C2Tx) as an efficient adsorbent to remove cesium (Cs+)
Source: Royal Society of Chemistry journal article supplement (doi:10.1039/c9dt01965k), 2019-01-01
Supplement: c9dt01965k1.pdf [file c9dt01965k1.pdf]

## Supplementary Information

### Two-dimensional transition metal carbide ( $Ti_3C_2T_x$ ) as an efficient adsorbent to remove cesium ( $Cs^+$ )

*Abdul Rehman Khan<sup>a</sup>, Syed M. Husnain<sup>b\*</sup>, Faisal Shahzad<sup>a\*</sup>, Syed Mujtaba-ul-Hassan<sup>a</sup>, Mazhar Mehmood<sup>a</sup>, Jamil Ahmad<sup>a</sup>, Muhammad Taqi Mehran<sup>c</sup>, Sohaila Rahman<sup>b</sup>*

<sup>a</sup>National Center for Nanotechnology, Department of Metallurgy and Materials Engineering, Pakistan Institute of Engineering and Applied Sciences (PIEAS), Islamabad 45650, Pakistan

<sup>b</sup>Chemistry Division, Directorate of Science, Pakistan Institute of Nuclear Science and Technology (PINSTECH), Islamabad, 45650 Pakistan

<sup>c</sup>School of Chemical and Materials Engineering, National University of Sciences and Technology (NUST), H-12, Islamabad, Pakistan

#### Corresponding Author

\*Corresponding author.

*E-mail address:* [hussnainchem@gmail.com](mailto:hussnainchem@gmail.com) (S.M.H)

\*Corresponding author. Tel.: +92-51-2207180, Fax: +92-51-9248600.

*E-mail address:* [faisal@pieas.edu.pk](mailto:faisal@pieas.edu.pk) (F.S), [dfaisalshahzad@gmail.com](mailto:dfaisalshahzad@gmail.com)

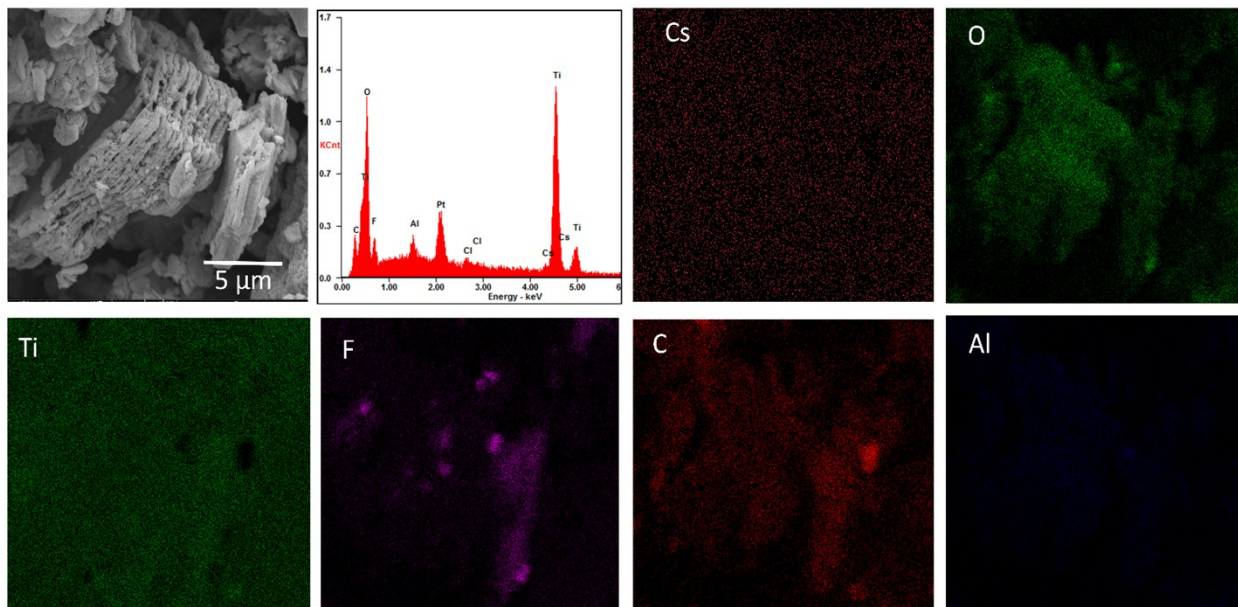

**Fig. S1** SEM image, EDS spectra and corresponding elemental mapping images of Cs, O, Ti, F, C and Al, respectively from Cs Loaded MXene.

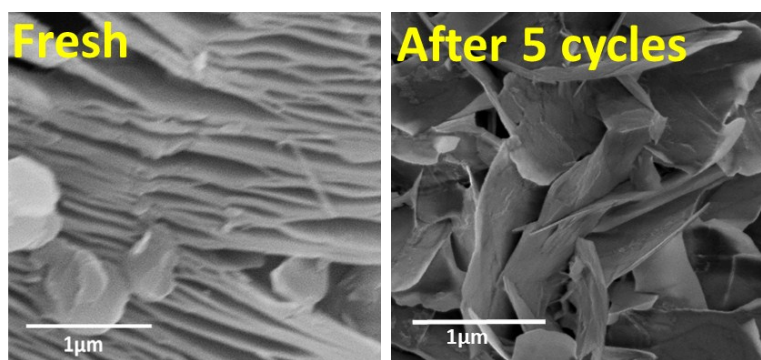

**Fig. S2** SEM images of unloaded MXene (Pristine) and Regenerated MXene after 5 cycles.
